# Supplementary material for: Effect of scan-time shortening on the 11C-PHNO binding potential to dopamine D3 receptor in humans and test–retest reliability
Source: Springer Nature journal article supplement (doi:10.1007/s12149-022-01819-4), 2023-01-19
Supplement: MOESM1 [file 23936908]

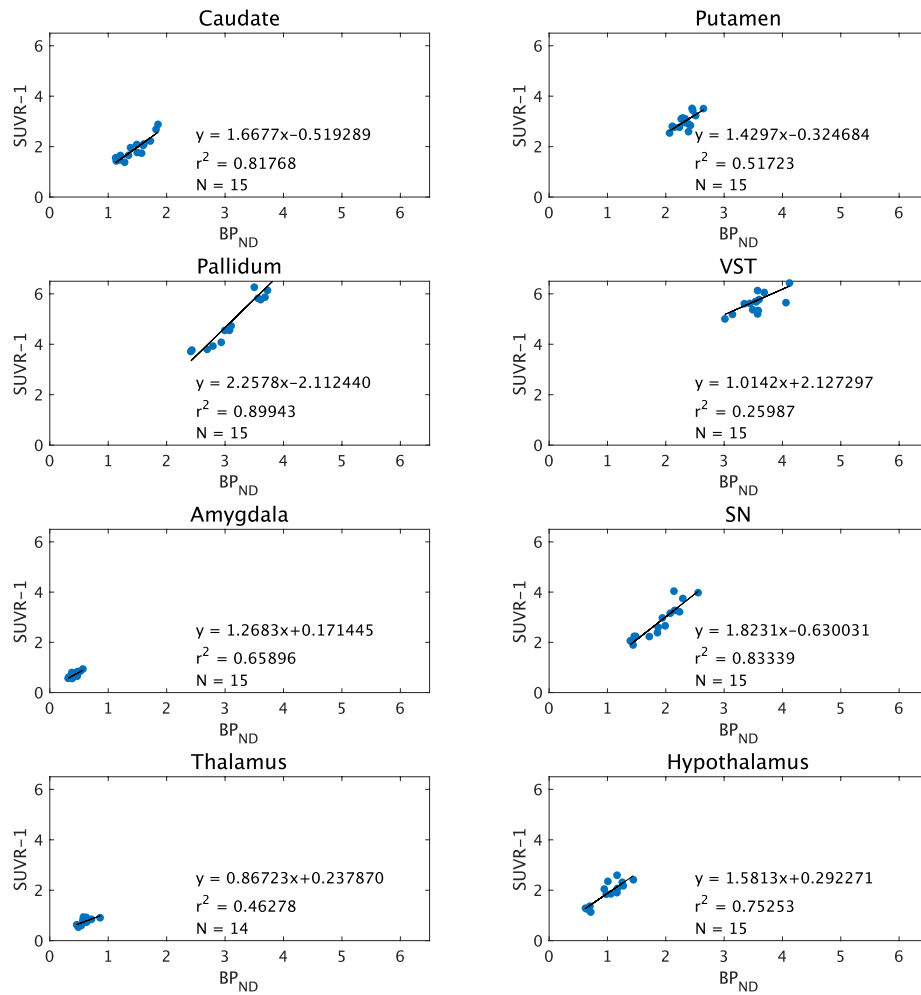

**Supplementary Fig. 1: BP<sub>ND</sub> values versus Standardized uptake value ratio (SUVR)**

- 1.

VST: ventral striatum; SN: substantia nigra. One outlier was excluded in the analysis

of the thalamus.
