# Supplementary material for: Effect of scan-time shortening on the 11C-PHNO binding potential to dopamine D3 receptor in humans and test–retest reliability
Source: Springer Nature journal article supplement (doi:10.1007/s12149-022-01819-4), 2023-01-19
Supplement: MOESM2 [file 23936908]

**Title:** Effect of scan-time shortening on the  $^{11}\text{C}$ -PHNO binding potential to dopamine  $\text{D}_3$  receptor in humans and test-retest reliability

**Journal name:** Annals of Nuclear Medicine

**Author names:** Keiko Matsunaga<sup>1</sup>, Misato Tonomura<sup>1,2</sup>, Kohji Abe<sup>1,2</sup> and Eku Shimosegawa<sup>1</sup>

<sup>1</sup> Department of Molecular Imaging in Medicine, Graduate School of Medicine, Osaka University, 2-1, Yamadaoka, Suita, Osaka, 565-0871, Japan

<sup>2</sup> Shionogi & Co., Ltd., 1-8, Doshomachi 3-chome, Chuo-ku, Osaka, 541-0045, Japan

Corresponding author: Keiko Matsunaga

E-mail: matsunaga.keiko.med@osaka-u.ac.jp

**Supplementary Table 1:** Regional BP<sub>ND</sub>, TRV, ICC, determination coefficient ( $r^2$ ), slopes and intercepts of the regression line for shortened scan times (n = 7 subjects)

| Scan time | Region   | Average <sup>1</sup> | $\Delta$ BP <sub>ND</sub> <sup>2</sup> | ICC <sup>3</sup>  | $r^2$ | Slope | Intercept |
|-----------|----------|----------------------|----------------------------------------|-------------------|-------|-------|-----------|
| 40 min    | Caudate  | 1.4 $\pm$ 0.2 (16%)  | 2% $\pm$ 6% (5%)                       | 0.94 (0.77; 0.98) | 0.983 | 0.877 | 0.143     |
|           | Putamen  | 2.3 $\pm$ 0.2 (7%)   | 3% $\pm$ 4% (4%)                       | 0.84 (0.5; 0.96)  | 0.795 | 0.898 | 0.21      |
|           | Pallidum | 2.7 $\pm$ 0.3 (13%)  | 4% $\pm$ 4% (4%)                       | 0.93 (0.76; 0.98) | 0.464 | 0.428 | 1.305     |
|           | VST      | 3.0 $\pm$ 0.3 (9%)   | -2% $\pm$ 7% (6%)                      | 0.76 (0.31; 0.94) | 0.7   | 0.857 | -0.001    |
|           | Amygdala | 0.4 $\pm$ 0.1 (20%)  | 3% $\pm$ 6% (5%)                       | 0.95 (0.83; 0.99) | 0.973 | 1.051 | -0.047    |
|           | SN       | 1.6 $\pm$ 0.3 (20%)  | 7% $\pm$ 19% (17%)                     | 0.6 (0.02; 0.89)  | 0.637 | 0.789 | 0.058     |

|        |                       |                 |                  |                     |       |       |        |
|--------|-----------------------|-----------------|------------------|---------------------|-------|-------|--------|
|        | Thalamus <sup>4</sup> | 0.6 ± 0.0 (6%)  | -16% ± 32% (26%) | -0.14 (-0.74; 0.65) | 0.443 | 2.324 | -0.68  |
|        | Hypothalamus          | 0.8 ± 0.4 (55%) | 5% ± 32% (22%)   | 0.94 (0.79; 0.99)   | 0.498 | 1.124 | -0.38  |
| 50 min | Caudate               | 1.4 ± 0.2 (17%) | 1% ± 6% (5%)     | 0.95 (0.81; 0.99)   | 0.994 | 0.928 | 0.075  |
|        | Putamen               | 2.3 ± 0.2 (7%)  | 2% ± 4% (3%)     | 0.85 (0.53; 0.96)   | 0.942 | 0.952 | 0.082  |
|        | Pallidum              | 2.7 ± 0.3 (13%) | 2% ± 5% (4%)     | 0.93 (0.75; 0.98)   | 0.785 | 0.572 | 0.914  |
|        | VST                   | 3.1 ± 0.3 (8%)  | 0% ± 6% (5%)     | 0.8 (0.39; 0.95)    | 0.735 | 0.777 | 0.365  |
|        | Amygdala              | 0.4 ± 0.1 (19%) | 1% ± 4% (4%)     | 0.97 (0.9; 0.99)    | 0.995 | 1.046 | -0.036 |
|        | SN                    | 1.6 ± 0.3 (19%) | 7% ± 14% (14%)   | 0.72 (0.23; 0.93)   | 0.821 | 0.884 | -0.055 |
|        | Thalamus <sup>4</sup> | 0.6 ± 0.1 (18%) | -4% ± 22% (18%)  | -0.09 (-0.72; 0.68) | 0.669 | 1.424 | -0.23  |
|        | Hypothalamus          | 0.8 ± 0.3 (34%) | 6% ± 19% (15%)   | 0.91 (0.68; 0.98)   | 0.724 | 0.849 | -0.095 |
| 60 min | Caudate               | 1.4 ± 0.2 (17%) | 1% ± 6% (5%)     | 0.95 (0.82; 0.99)   | 0.997 | 0.954 | 0.047  |

|        |                       |                 |                 |                   |       |       |        |
|--------|-----------------------|-----------------|-----------------|-------------------|-------|-------|--------|
|        | Putamen               | 2.3 ± 0.2 (7%)  | 2% ± 4% (3%)    | 0.86 (0.54; 0.96) | 0.978 | 0.978 | 0.031  |
|        | Pallidum              | 2.8 ± 0.4 (14%) | 0% ± 4% (3%)    | 0.95 (0.83; 0.99) | 0.939 | 0.701 | 0.575  |
|        | VST                   | 3.2 ± 0.3 (8%)  | 0% ± 6% (5%)    | 0.83 (0.47; 0.96) | 0.876 | 0.859 | 0.154  |
|        | Amygdala              | 0.4 ± 0.1 (19%) | 1% ± 3% (3%)    | 0.98 (0.92; 1)    | 0.997 | 1.023 | -0.023 |
|        | SN                    | 1.7 ± 0.3 (19%) | 4% ± 11% (10%)  | 0.81 (0.41; 0.95) | 0.94  | 0.953 | -0.11  |
|        | Thalamus <sup>4</sup> | 0.6 ± 0.1 (15%) | -5% ± 16% (14%) | 0.6 (-0.05; 0.9)  | 0.826 | 1.206 | -0.116 |
|        | Hypothalamus          | 0.8 ± 0.2 (30%) | 3% ± 17% (13%)  | 0.88 (0.59; 0.97) | 0.808 | 0.836 | -0.04  |
| 70 min | Caudate               | 1.4 ± 0.2 (17%) | 1% ± 6% (5%)    | 0.95 (0.82; 0.99) | 0.998 | 0.973 | 0.027  |
|        | Putamen               | 2.3 ± 0.2 (7%)  | 2% ± 4% (3%)    | 0.86 (0.56; 0.97) | 0.99  | 0.996 | -0.002 |
|        | Pallidum              | 2.9 ± 0.4 (14%) | -1% ± 5% (4%)   | 0.94 (0.8; 0.99)  | 0.966 | 0.756 | 0.48   |
|        | VST                   | 3.3 ± 0.3 (8%)  | 0% ± 6% (5%)    | 0.84 (0.49; 0.96) | 0.914 | 0.866 | 0.207  |

|        |                       |                     |                       |                   |       |       |        |
|--------|-----------------------|---------------------|-----------------------|-------------------|-------|-------|--------|
|        | Amygdala              | $0.4 \pm 0.1$ (19%) | $1\% \pm 4\%$ (3%)    | 0.98 (0.91; 0.99) | 0.998 | 1.018 | -0.017 |
|        | SN                    | $1.7 \pm 0.3$ (17%) | $3\% \pm 10\%$ (8%)   | 0.84 (0.5; 0.96)  | 0.973 | 0.949 | -0.04  |
|        | Thalamus <sup>4</sup> | $0.6 \pm 0.1$ (13%) | $-5\% \pm 14\%$ (12%) | 0.59 (-0.06; 0.9) | 0.9   | 1.109 | -0.063 |
|        | Hypothalamus          | $0.8 \pm 0.2$ (26%) | $2\% \pm 16\%$ (12%)  | 0.85 (0.52; 0.96) | 0.925 | 0.835 | -0.001 |
| 80 min | Caudate               | $1.4 \pm 0.2$ (17%) | $1\% \pm 6\%$ (5%)    | 0.95 (0.81; 0.99) | 0.999 | 0.982 | 0.018  |
|        | Putamen               | $2.3 \pm 0.2$ (7%)  | $2\% \pm 4\%$ (3%)    | 0.87 (0.56; 0.97) | 0.996 | 1.001 | -0.01  |
|        | Pallidum              | $3.0 \pm 0.4$ (14%) | $-1\% \pm 5\%$ (3%)   | 0.94 (0.8; 0.99)  | 0.979 | 0.811 | 0.374  |
|        | VST                   | $3.3 \pm 0.3$ (9%)  | $0\% \pm 5\%$ (4%)    | 0.9 (0.67; 0.98)  | 0.956 | 0.951 | -0.027 |
|        | Amygdala              | $0.4 \pm 0.1$ (18%) | $2\% \pm 4\%$ (3%)    | 0.97 (0.9; 0.99)  | 0.999 | 1.014 | -0.012 |
|        | SN                    | $1.8 \pm 0.3$ (17%) | $3\% \pm 9\%$ (8%)    | 0.88 (0.6; 0.97)  | 0.981 | 0.951 | 0.007  |
|        | Thalamus <sup>4</sup> | $0.6 \pm 0.1$ (13%) | $-4\% \pm 12\%$ (11%) | 0.66 (0.06; 0.92) | 0.95  | 1.072 | -0.043 |

|         |                       |                 |                 |                   |       |       |        |
|---------|-----------------------|-----------------|-----------------|-------------------|-------|-------|--------|
|         | Hypothalamus          | 0.9 ± 0.2 (25%) | 1% ± 14% (11%)  | 0.9 (0.67; 0.98)  | 0.967 | 0.834 | 0.036  |
| 90 min  | Caudate               | 1.4 ± 0.3 (17%) | 1% ± 6% (5%)    | 0.95 (0.81; 0.99) | 1     | 0.988 | 0.012  |
|         | Putamen               | 2.3 ± 0.2 (7%)  | 2% ± 4% (3%)    | 0.87 (0.56; 0.97) | 0.998 | 1     | -0.005 |
|         | Pallidum              | 3.0 ± 0.5 (15%) | -1% ± 5% (3%)   | 0.94 (0.8; 0.99)  | 0.991 | 0.86  | 0.283  |
|         | VST                   | 3.4 ± 0.3 (9%)  | -1% ± 4% (3%)   | 0.9 (0.67; 0.98)  | 0.982 | 0.964 | -0.016 |
|         | Amygdala              | 0.4 ± 0.1 (18%) | 1% ± 4% (3%)    | 0.97 (0.9; 0.99)  | 0.999 | 1.01  | -0.009 |
|         | SN                    | 1.8 ± 0.3 (16%) | 2% ± 8% (7%)    | 0.88 (0.6; 0.97)  | 0.985 | 0.953 | 0.038  |
|         | Thalamus <sup>5</sup> | 0.6 ± 0.1 (12%) | -3% ± 12% (10%) | 0.66 (0.06; 0.92) | 0.739 | 1.461 | -0.284 |
|         | Hypothalamus          | 0.9 ± 0.2 (25%) | 0% ± 11% (9%)   | 0.9 (0.67; 0.98)  | 0.975 | 0.859 | 0.042  |
| 100 min | Caudate               | 1.5 ± 0.3 (17%) | 1% ± 6% (5%)    | 0.95 (0.82; 0.99) | 1     | 0.994 | 0.006  |
|         | Putamen               | 2.3 ± 0.2 (7%)  | 2% ± 4% (3%)    | 0.87 (0.57; 0.97) | 0.999 | 0.998 | 0.002  |

|         |                       |                 |                 |                   |       |       |        |
|---------|-----------------------|-----------------|-----------------|-------------------|-------|-------|--------|
|         | Pallidum              | 3.1 ± 0.5 (16%) | -1% ± 4% (3%)   | 0.96 (0.84; 0.99) | 0.997 | 0.917 | 0.163  |
|         | VST                   | 3.5 ± 0.3 (9%)  | -1% ± 4% (3%)   | 0.91 (0.7; 0.98)  | 0.993 | 0.99  | -0.059 |
|         | Amygdala              | 0.4 ± 0.1 (18%) | 1% ± 4% (3%)    | 0.97 (0.89; 0.99) | 1     | 1.005 | -0.005 |
|         | SN                    | 1.8 ± 0.3 (17%) | 2% ± 7% (6%)    | 0.91 (0.71; 0.98) | 0.99  | 0.961 | 0.047  |
|         | Thalamus <sup>5</sup> | 0.6 ± 0.1 (12%) | -2% ± 11% (10%) | 0.68 (0.1; 0.93)  | 0.951 | 1.266 | -0.148 |
|         | Hypothalamus          | 1.0 ± 0.2 (25%) | -1% ± 10% (9%)  | 0.91 (0.7; 0.98)  | 0.99  | 0.896 | 0.035  |
| 110 min | Caudate               | 1.5 ± 0.3 (17%) | 1% ± 6% (5%)    | 0.95 (0.82; 0.99) | 1     | 0.997 | 0.003  |
|         | Putamen               | 2.3 ± 0.2 (7%)  | 2% ± 4% (3%)    | 0.87 (0.57; 0.97) | 1     | 0.999 | 0.002  |
|         | Pallidum              | 3.1 ± 0.5 (16%) | -2% ± 4% (3%)   | 0.96 (0.84; 0.99) | 0.998 | 0.95  | 0.115  |
|         | VST                   | 3.5 ± 0.3 (9%)  | 0% ± 4% (3%)    | 0.92 (0.73; 0.98) | 0.998 | 1.005 | -0.063 |
|         | Amygdala              | 0.4 ± 0.1 (18%) | 2% ± 4% (3%)    | 0.97 (0.89; 0.99) | 1     | 1.003 | -0.002 |

|                       |                 |                |                    |       |       |        |
|-----------------------|-----------------|----------------|--------------------|-------|-------|--------|
| SN                    | 1.8 ± 0.3 (17%) | 1% ± 6% (5%)   | 0.94 (0.79; 0.99)  | 0.997 | 0.987 | 0.002  |
| Thalamus <sup>5</sup> | 0.6 ± 0.1 (12%) | -3% ± 11% (9%) | 0.59 (-0.15; 0.92) | 0.987 | 1.118 | -0.066 |
| Hypothalamus          | 1.0 ± 0.2 (25%) | 0% ± 11% (9%)  | 0.91 (0.69; 0.98)  | 0.993 | 0.933 | 0.031  |

---

<sup>1</sup>Data are presented as mean ± SD (relative SD) across subjects.

<sup>2</sup>Data are presented as  $m(\Delta BP_{ND}) \pm \sigma(\Delta BP_{ND}) (m|\Delta BP_{ND}|)$ .

<sup>3</sup>ICC is presented as an estimate, with the lower and upper bounds of the 95% confidence interval shown in parentheses.

<sup>4</sup>Exclude 4 outliers. n = 3 subjects.

<sup>5</sup>Exclude 1 outlier. n = 6 subjects.

VST: ventral striatum; SN: substantia nigra.
