# Supplementary material for: Effect of scan-time shortening on the 11C-PHNO binding potential to dopamine D3 receptor in humans and test–retest reliability
Source: Springer Nature journal article supplement (doi:10.1007/s12149-022-01819-4), 2023-01-19
Supplement: MOESM3 [file 23936908]

**Supplementary Table 2:** Standardized uptake value ratio (SUVR) -1 over 90-120

min obtained from test-retest scans (n = 7 subjects)

| Region       | Average <sup>1</sup> | $\Delta BP_{ND}$ <sup>2</sup> | ICC <sup>3</sup>   |
|--------------|----------------------|-------------------------------|--------------------|
| Caudate      | 1.9 $\pm$ 0.4 (23%)  | 0.7% $\pm$ 2.8% (3%)          | 0.90 (0.65; 0.97)  |
| Putamen      | 3.0 $\pm$ 0.3 (10%)  | 1.2% $\pm$ 1.7% (2%)          | 0.73 (0.25; 0.93)  |
| Pallidum     | 5.0 $\pm$ 1.1 (22%)  | -0.1% $\pm$ 1.2% (1%)         | 0.98 (0.93; 1)     |
| VST          | 5.7 $\pm$ 0.6 (10%)  | 1.1% $\pm$ 1.9% (2%)          | 0.57 (-0.02; 0.88) |
| Amygdala     | 0.7 $\pm$ 0.1 (16%)  | 1.9% $\pm$ 3.0% (2%)          | 0.64 (0.09; 0.90)  |
| SN           | 2.8 $\pm$ 0.6 (23%)  | 1% $\pm$ 0.9% (1%)            | 0.97 (0.9; 0.99)   |
| Thalamus     | 0.7 $\pm$ 0.1 (17%)  | 0.8% $\pm$ 1.9% (2%)          | 0.9 (0.62; 0.98)   |
| Hypothalamus | 1.9 $\pm$ 0.5 (24%)  | 0.5% $\pm$ 3.2% (3%)          | 0.87 (0.57; 0.97)  |

<sup>1</sup>Data are presented as mean  $\pm$  SD (relative SD) across subjects.

<sup>2</sup>Data are presented as  $m (\Delta(\text{SUVR} - 1)) \pm \sigma(\Delta(\text{SUVR} - 1)) (m|\Delta(\text{SUVR} - 1)|)$ .

<sup>3</sup>ICC is presented as an estimate, with the lower and upper bounds of the 95% confidence interval shown in parentheses.

VST: ventral striatum; SN: substantia nigra.
